# Supplementary material for: Core values and best practice criteria for interprofessional teams in primary care: a qualitative interview study with general practitioners and other health professionals from Bavaria, Germany
Source: Research Square preprint supplement (doi:10.21203/rs.3.rs-7214005/v1), 2025-09-04
Supplement: Supplementary file 3 [file 839f7a1a23d0c8dd15f4a39a.docx]

Additional file 1: Selected main categories and subcategories from the coding tree for the analysis of core values and best practices

| **Main category** | **Subcategories** |
| --- | --- |
| Characteristics of the sample | - Professional group - Number of speech contributions - Gender - Age - Professional experience - Everyday and social life |
| Concepts of primary care | - Professional experience from other regions/ countries - Heard from concepts from other regions/ countries (e.g. from colleagues) - Theoretical knowledge about concepts from other regions/ countries |
| Values and best practices | - Desired attributes of a future general practice - Good general practice/ family medicine - Measurement of future concepts of care - Effects of team-based concepts on care |
